# Supplementary material for: Initial Combination of Empagliflozin and Linagliptin in Subjects With Type 2 Diabetes
Source: Oxford University Press journal article supplement (doi:10.2337/dc14-2365), 2015-01-29
Supplement: dc142365supplementarydata.pdf [file dc142365supplementarydata.pdf]

SUPPLEMENTARY DATA

**Supplementary Table 1.** Analyses of HbA<sub>1c</sub> and fasting plasma glucose (FPG) at week 24 using mixed model repeated measures (MMRM) analysis in the full analysis set using observed cases.

|                                                                                       | Empagliflozin 25 mg/<br>linagliptin 5 mg               | Empagliflozin 10 mg/<br>linagliptin 5 mg               | Empagliflozin<br>25 mg        | Empagliflozin<br>10 mg       | Linagliptin<br>5 mg          |
|---------------------------------------------------------------------------------------|--------------------------------------------------------|--------------------------------------------------------|-------------------------------|------------------------------|------------------------------|
| <b>HbA<sub>1c</sub>, n</b>                                                            | 121                                                    | 124                                                    | 120                           | 120                          | 112                          |
| Adjusted mean (SE) change from baseline in HbA <sub>1c</sub> at week 24, % [mmol/mol] | -1.07 (0.07)<br>[-11.7 (0.8)]                          | -1.26 (0.07)<br>[-13.8 (0.8)]                          | -0.95 (0.07)<br>[-10.4 (0.8)] | -0.84 (0.07)<br>[-9.2 (0.8)] | -0.69 (0.07)<br>[-7.5 (0.8)] |
| Adjusted mean (95% CI) difference vs. empagliflozin 25 mg, % [mmol/mol]               | -0.12 (-0.32, 0.08)<br>[-1.3 (-3.5, 0.9)]<br>p=0.249   | –                                                      | –                             | –                            | –                            |
| Adjusted mean (95% CI) difference vs. empagliflozin 10 mg, % [mmol/mol]               | –                                                      | -0.41 (-0.62, -0.21)<br>[-4.5 (-6.8, -2.3)]<br>p<0.001 | –                             | –                            | –                            |
| Adjusted mean (95% CI) difference vs. linagliptin 5 mg, % [mmol/mol]                  | -0.38 (-0.58, -0.18)<br>[-4.2 (-6.4, -1.9)]<br>p<0.001 | -0.57 (-0.77, -0.36)<br>[-6.2 (-8.4, -4.0)]<br>p<0.001 | –                             | –                            | –                            |
| <b>FPG, n</b>                                                                         | 122                                                    | 122                                                    | 119                           | 120                          | 111                          |
| Adjusted mean (SE) change from baseline in FPG at week 24, mg/dL                      | -29.9 (2.4)                                            | -27.6 (2.4)                                            | -24.6 (2.4)                   | -24.6 (2.4)                  | -7.9 (2.5)                   |
| Adjusted mean (95% CI) difference vs. empagliflozin 25 mg, mg/dL                      | -5.3 (-12.0, 1.4)<br>p=0.118                           | –                                                      | –                             | –                            | –                            |
| Adjusted mean (95% CI) difference vs. empagliflozin 10 mg, mg/dL                      | –                                                      | -3.0 (-9.7, 3.6)<br>p=0.374                            | –                             | –                            | –                            |
| Adjusted mean (95% CI) difference vs. linagliptin 5 mg, mg/dL                         | -22.3 (-28.8, -15.3)<br>p<0.001                        | -19.8 (-26.5, -13.1)<br>p<0.001                        | –                             | –                            | –                            |

SUPPLEMENTARY DATA

**Supplementary Table 2.** Analyses of fasting plasma glucose (FPG) at week 52 (analysis of covariance [ANCOVA] in full analysis set using last observation carried forward [LOCF] imputation).

|                                                                  | Empagliflozin 25 mg/<br>linagliptin 5 mg<br>(n=134) | Empagliflozin 10 mg/<br>linagliptin 5 mg<br>(n=135) | Empagliflozin<br>25 mg<br>(n=133) | Empagliflozin<br>10 mg<br>(n=132) | Linagliptin<br>5 mg<br>(n=133) |
|------------------------------------------------------------------|-----------------------------------------------------|-----------------------------------------------------|-----------------------------------|-----------------------------------|--------------------------------|
| Adjusted mean (SE) change from baseline in FPG at week 52, mg/dL | -25.3 (3.0)                                         | -23.8 (3.0)                                         | -19.9 (3.0)                       | -16.8 (3.0)                       | 2.8 (3.0)                      |
| Adjusted mean (95% CI) difference vs. empagliflozin 25 mg, mg/dL | -5.5 (-13.7, 2.8)<br>p=0.197                        | –                                                   | –                                 | –                                 | –                              |
| Adjusted mean (95% CI) difference vs. empagliflozin 10 mg, mg/dL | –                                                   | -7.0 (-15.3, 1.3)<br>p=0.096                        | –                                 | –                                 | –                              |
| Adjusted mean (95% CI) difference vs. linagliptin 5 mg, mg/dL    | -28.1 (-36.3, -19.8)<br>p<0.001                     | -26.6 (-34.8, -18.3)<br>p<0.001                     | –                                 | –                                 | –                              |

SUPPLEMENTARY DATA

**Supplementary Table 3.** Laboratory results at week 52.

|                                               | Empagliflozin 25 mg/<br>linagliptin 5 mg |                             | Empagliflozin 10 mg/<br>linagliptin 5 mg |                             | Empagliflozin<br>25 mg |                             | Empagliflozin<br>10 mg |                             | Linagliptin<br>5 mg |                             |
|-----------------------------------------------|------------------------------------------|-----------------------------|------------------------------------------|-----------------------------|------------------------|-----------------------------|------------------------|-----------------------------|---------------------|-----------------------------|
|                                               | Baseline                                 | Change<br>from<br>baseline* | Baseline                                 | Change<br>from<br>baseline* | Baseline               | Change<br>from<br>baseline* | Baseline               | Change<br>from<br>baseline* | Baseline            | Change<br>from<br>baseline* |
| Hematocrit, %                                 | 42.8 ± 4.9                               | 4.8 ± 4.3                   | 43.9 ± 4.8                               | 4.2 ± 3.4                   | 43.2 ± 5.3             | 4.8 ± 3.9                   | 44.2 ± 5.1             | 4.3 ± 3.6                   | 43.2 ± 4.8          | 1.3 ± 3.8                   |
| Uric acid, µmol/l                             | 292.0 ±<br>116.0                         | -56.5 ± 83.9                | 320.6 ±<br>117.8                         | -70.2 ±<br>87.4             | 313.5 ±<br>125.5       | -71.4 ±<br>94.6             | 309.9 ±<br>118.4       | -60.1 ±<br>83.9             | 300.4 ±<br>123.1    | 3.0 ±<br>73.8               |
| Serum creatinine, µmol/l                      | 77.8 ±<br>12.4                           | -0.9 ±<br>8.0               | 78.7 ± 11.5                              | 0.0 ±<br>8.8                | 78.7 ± 10.6            | 0.0 ±<br>7.1                | 78.7 ± 12.4            | -0.9 ±<br>7.1               | 78.7 ± 10.6         | 0.0 ±<br>6.2                |
| eGFR, ml/min/1.73m <sup>2</sup>               | 90.3 ±<br>19.6                           |                             | 87.8 ± 17.6                              |                             | 88.8 ± 18.5            |                             | 88.4 ± 19.0            |                             | 89.7 ± 20.2         |                             |
| At week 52                                    |                                          | 0.8 ± 11.6                  |                                          | 1.5 ± 11.4                  |                        | 0.2 ± 11.9                  |                        | 1.0 ± 12.5                  |                     | -0.5 ± 10.9                 |
| At follow-up                                  |                                          | 3.9 ± 12.7                  |                                          | 4.0 ± 11.7                  |                        | 3.3 ± 11.1                  |                        | 3.7 ± 12.4                  |                     | 1.5 ± 11.5                  |
| Urinary albumin to creatinine<br>ratio (mg/g) | 33.5 ±<br>119.7                          | -3.9 ± 54.0                 | 30.5 ± 86.1                              | 8.8 ±<br>87.5               | 21.9 ± 41.4            | 2.5 ±<br>54.8               | 56.7 ±<br>340.3        | -5.2 ± 44.1                 | 31.9 ±<br>133.7     | 35.1 ±<br>285.6             |
| Electrolytes, mmol/l                          |                                          |                             |                                          |                             |                        |                             |                        |                             |                     |                             |
| Sodium                                        | 141 ± 2                                  | 1 ± 2                       | 141 ± 2                                  | 1 ± 2                       | 141 ± 2                | 1 ± 2                       | 141 ± 2                | 1 ± 2                       | 141 ± 2             | 0 ± 2                       |
| Potassium                                     | 4.1 ± 0.3                                | 0.1 ± 0.3                   | 4.1 ± 0.3                                | -0.0 ± 0.3                  | 4.1 ± 0.3              | 0.0 ± 0.3                   | 4.1 ± 0.3              | 0.1 ± 0.3                   | 4.1 ± 0.3           | 0.0 ± 0.3                   |
| Calcium                                       | 2.4 ± 0.1                                | 0.0 ± 0.1                   | 2.4 ± 0.1                                | -0.0 ± 0.1                  | 2.4 ± 0.1              | 0.0 ± 0.1                   | 2.4 ± 0.1              | -0.0 ± 0.1                  | 2.4 ± 0.1           | -0.0 ± 0.1                  |
| Magnesium                                     | 1.0 ± 0.1                                | 0.1 ± 0.1                   | 1.0 ± 0.1                                | 0.1 ± 0.1                   | 0.1 ± 0.1              | 0.1 ± 0.1                   | 1.0 ± 0.1              | 0.1 ± 0.1                   | 1.0 ± 0.1           | -0.0 ± 0.1                  |
| Phosphate                                     | 1.2 ± 0.1                                | 0.0 ± 0.1                   | 1.2 ± 0.1                                | 0.0 ± 0.1                   | 1.2 ± 0.1              | 0.0 ± 0.1                   | 1.2 ± 0.1              | 0.0 ± 0.1                   | 1.2 ± 0.1           | 0.0 ± 0.1                   |
| Total cholesterol (mmol/l)                    | 5.0 ± 0.1                                | 0.1 ± 0.1                   | 5.1 ± 0.1                                | 0.0 ± 0.1                   | 4.9 ± 0.1              | 0.2 ± 0.1                   | 5.1 ± 0.1              | 0.2 ± 0.1                   | 5.0 ± 0.1           | -0.1 ± 0.1                  |
| Difference vs. empagliflozin<br>25 mg         |                                          | -0.1 ± 0.1<br>p = 0.443     |                                          |                             |                        |                             |                        |                             |                     |                             |
| Difference vs. empagliflozin<br>10 mg         |                                          |                             |                                          | -0.1 ± 0.1<br>p = 0.164     |                        |                             |                        |                             |                     |                             |
| Difference vs.<br>linagliptin 5 mg            |                                          | 0.2 ± 0.1<br>p = 0.036      |                                          | 0.1 ± 0.1<br>p = 0.135      |                        |                             |                        |                             |                     |                             |
| HDL-cholesterol (mmol/l)                      | 1.2 ± 0.0                                | 0.1 ± 0.0                   | 1.1 ± 0.0                                | 0.1 ± 0.0                   | 1.2 ± 0.0              | 0.1 ± 0.0                   | 1.2 ± 0.0              | 0.1 ± 0.0                   | 1.2 ± 0.0           | 0.0 ± 0.0                   |
| Difference vs. empagliflozin<br>25 mg         |                                          | 0.0 ± 0.0<br>p = 0.126      |                                          |                             |                        |                             |                        |                             |                     |                             |
| Difference vs. empagliflozin<br>10 mg         |                                          |                             |                                          | 0.0 ± 0.0<br>p = 0.507      |                        |                             |                        |                             |                     |                             |

SUPPLEMENTARY DATA

|                                    |           |                         |           |                         |           |            |           |           |           |            |
|------------------------------------|-----------|-------------------------|-----------|-------------------------|-----------|------------|-----------|-----------|-----------|------------|
| Difference vs. linagliptin 5 mg    |           | 0.1 ± 0.0<br>p = 0.004  |           | 0.1 ± 0.0<br>p < 0.001  |           |            |           |           |           |            |
| LDL-cholesterol (mmol/l)           | 2.9 ± 0.1 | 0.0 ± 0.1               | 3.0 ± 0.1 | -0.1 ± 0.1              | 2.9 ± 0.1 | 0.1 ± 0.1  | 3.0 ± 0.1 | 0.0 ± 0.1 | 2.9 ± 0.1 | -0.1 ± 0.1 |
| Difference vs. empagliflozin 25 mg |           | -0.0 ± 0.1<br>p = 0.759 |           |                         |           |            |           |           |           |            |
| Difference vs. empagliflozin 10 mg |           |                         |           | -0.1 ± 0.1<br>p = 0.355 |           |            |           |           |           |            |
| Difference vs. linagliptin 5 mg    |           | 0.1 ± 0.1<br>p = 0.155  |           | 0.0 ± 0.1<br>p = 0.639  |           |            |           |           |           |            |
| Triglycerides (mmol/l)             | 2.0 ± 0.1 | -0.1 ± 0.1              | 2.1 ± 0.1 | -0.0 ± 0.1              | 2.0 ± 0.1 | -0.1 ± 0.1 | 2.3 ± 0.1 | 0.2 ± 0.1 | 2.1 ± 0.3 | -0.2 ± 0.1 |
| Difference vs. empagliflozin 25 mg |           | 0.0 ± 0.1<br>p = 0.905  |           |                         |           |            |           |           |           |            |
| Difference vs. empagliflozin 10 mg |           |                         |           | -0.2 ± 0.1<br>p = 0.227 |           |            |           |           |           |            |
| Difference vs. linagliptin 5 mg    |           | 0.1 ± 0.1<br>p = 0.534  |           | 0.1 ± 0.1<br>p = 0.292  |           |            |           |           |           |            |

Data are mean (SD) in the treated set except for lipid parameters, which are adjusted mean ± standard error based on ANCOVA with treatment, region and eGFR at baseline as fixed effects and baseline HbA1c and the baseline value for the endpoint in question as linear covariates.

Data are normalized to a standard reference range, except for eGFR and lipids.

\*Changes from baseline at last value on treatment, except for eGFR and lipids which are changes from baseline at week 52 or follow-up.

SUPPLEMENTARY DATA

**Supplementary Table 4.** Subjects with shifts in urine albumin to creatinine ratio (mg/g)

|                                             | Baseline       |                  |                  |
|---------------------------------------------|----------------|------------------|------------------|
|                                             | No albuminuria | Microalbuminuria | Macroalbuminuria |
| <b>Empagliflozin 25 mg/linagliptin 5 mg</b> |                |                  |                  |
| At end of treatment, n (%)                  |                |                  |                  |
| No albuminuria                              | 113 (98.3)     | 1 (10.0)         | 0                |
| Microalbuminuria                            | 2 (1.7)        | 9 (90.0)         | 2 (50.0)         |
| Macroalbuminuria                            | 0              | 0                | 2 (50.0)         |
| <b>Empagliflozin 10 mg/linagliptin 5 mg</b> |                |                  |                  |
| At end of treatment, n (%)                  |                |                  |                  |
| No albuminuria                              | 104 (93.7)     | 3 (15.8)         | 1 (33.3)         |
| Microalbuminuria                            | 6 (5.5)        | 16 (84.2)        | 0                |
| Macroalbuminuria                            | 1 (0.9)        | 0                | 2 (66.7)         |
| <b>Empagliflozin 25 mg</b>                  |                |                  |                  |
| At end of treatment, n (%)                  |                |                  |                  |
| No albuminuria                              | 103 (94.5)     | 8 (40.0)         | 0                |
| Microalbuminuria                            | 6 (5.4)        | 11 (55.0)        | 0                |
| Macroalbuminuria                            | 0              | 1 (5.0)          | 0                |
| <b>Empagliflozin 10 mg</b>                  |                |                  |                  |

SUPPLEMENTARY DATA

|                            |            |           |           |
|----------------------------|------------|-----------|-----------|
| At end of treatment, n (%) |            |           |           |
| No albuminuria             | 96 (90.6)  | 10 (47.6) | 0         |
| Microalbuminuria           | 10 (9.4)   | 11 (52.4) | 1 (33.3)  |
| Macroalbuminuria           | 0          | 0         | 2 (66.7)  |
| <b>Linagliptin 5 mg</b>    |            |           |           |
| At end of treatment, n (%) |            |           |           |
| No albuminuria             | 100 (90.1) | 9 (56.3)  | 0         |
| Microalbuminuria           | 10 (9.0)   | 6 (37.5)  | 0         |
| Macroalbuminuria           | 1 (0.9)    | 1 (6.3)   | 2 (100.0) |

Data are n (%) in the treated set. No albuminuria was defined as urine albumin to creatinine ratio <30 mg/g, microalbuminuria as urine albumin to creatinine ratio ≥30 to <300 mg/g and macroalbuminuria as urine albumin to creatinine ratio ≥300 mg/g.

SUPPLEMENTARY DATA

Supplementary Figure 1. Subject disposition.

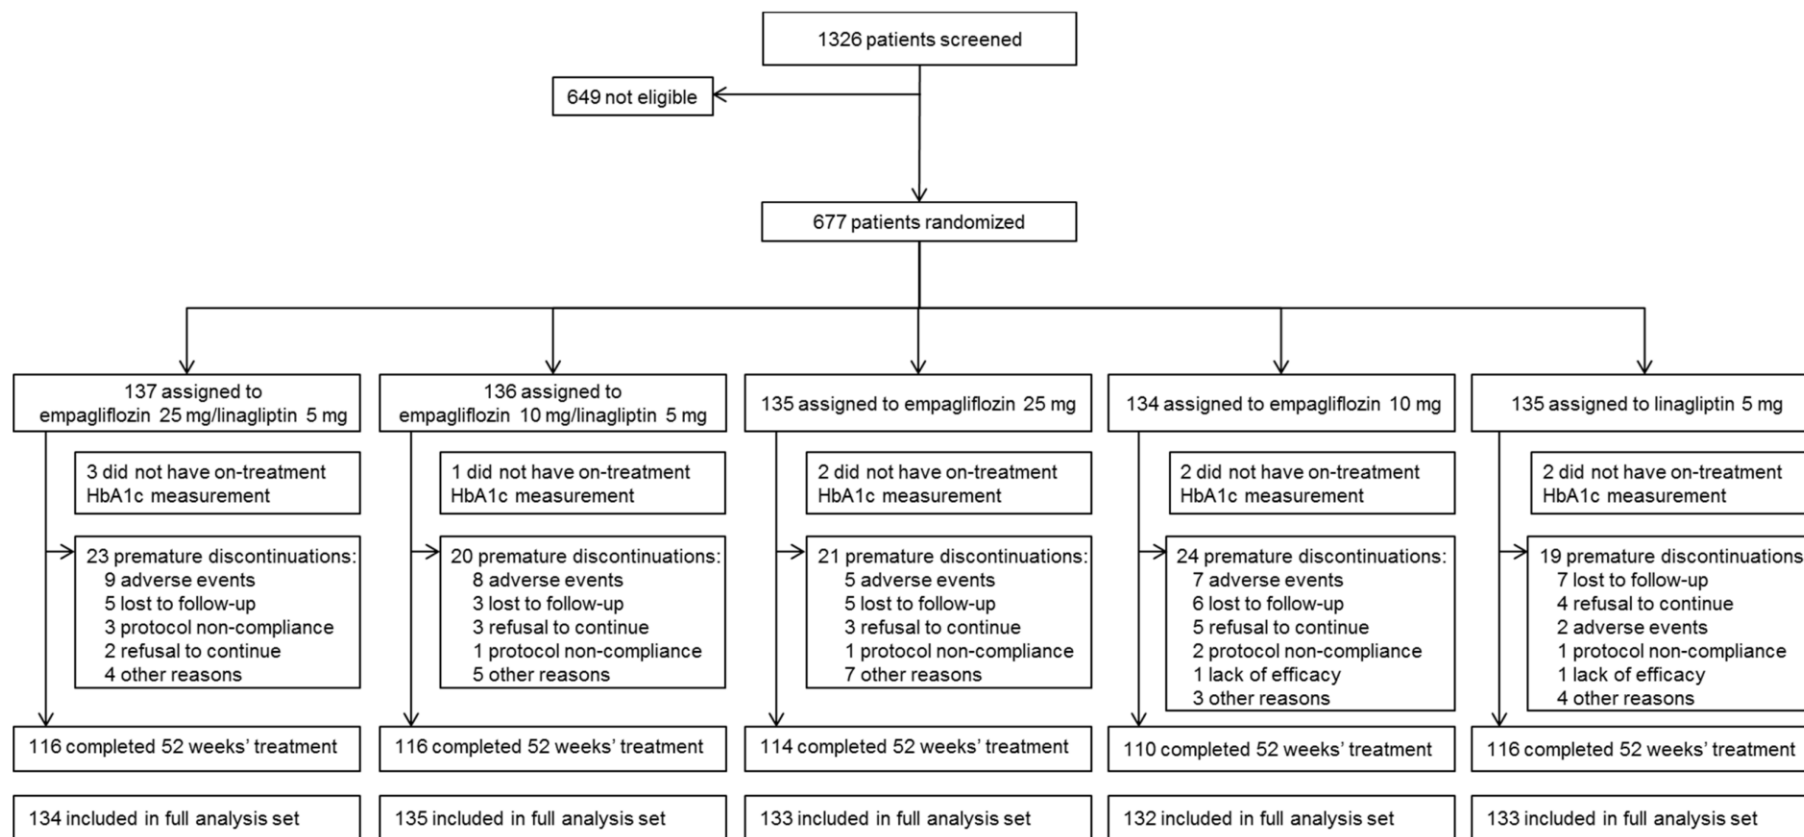

SUPPLEMENTARY DATA

**Supplementary Figure 2.** Change from baseline in HbA1c at week 24 in subjects with baseline HbA1c <8.5% (<69 mmol/mol) (analysis of covariance [ANCOVA] in the full analysis set using last observation carried forward [LOCF] imputation). Data are adjusted mean  $\pm$  standard error.

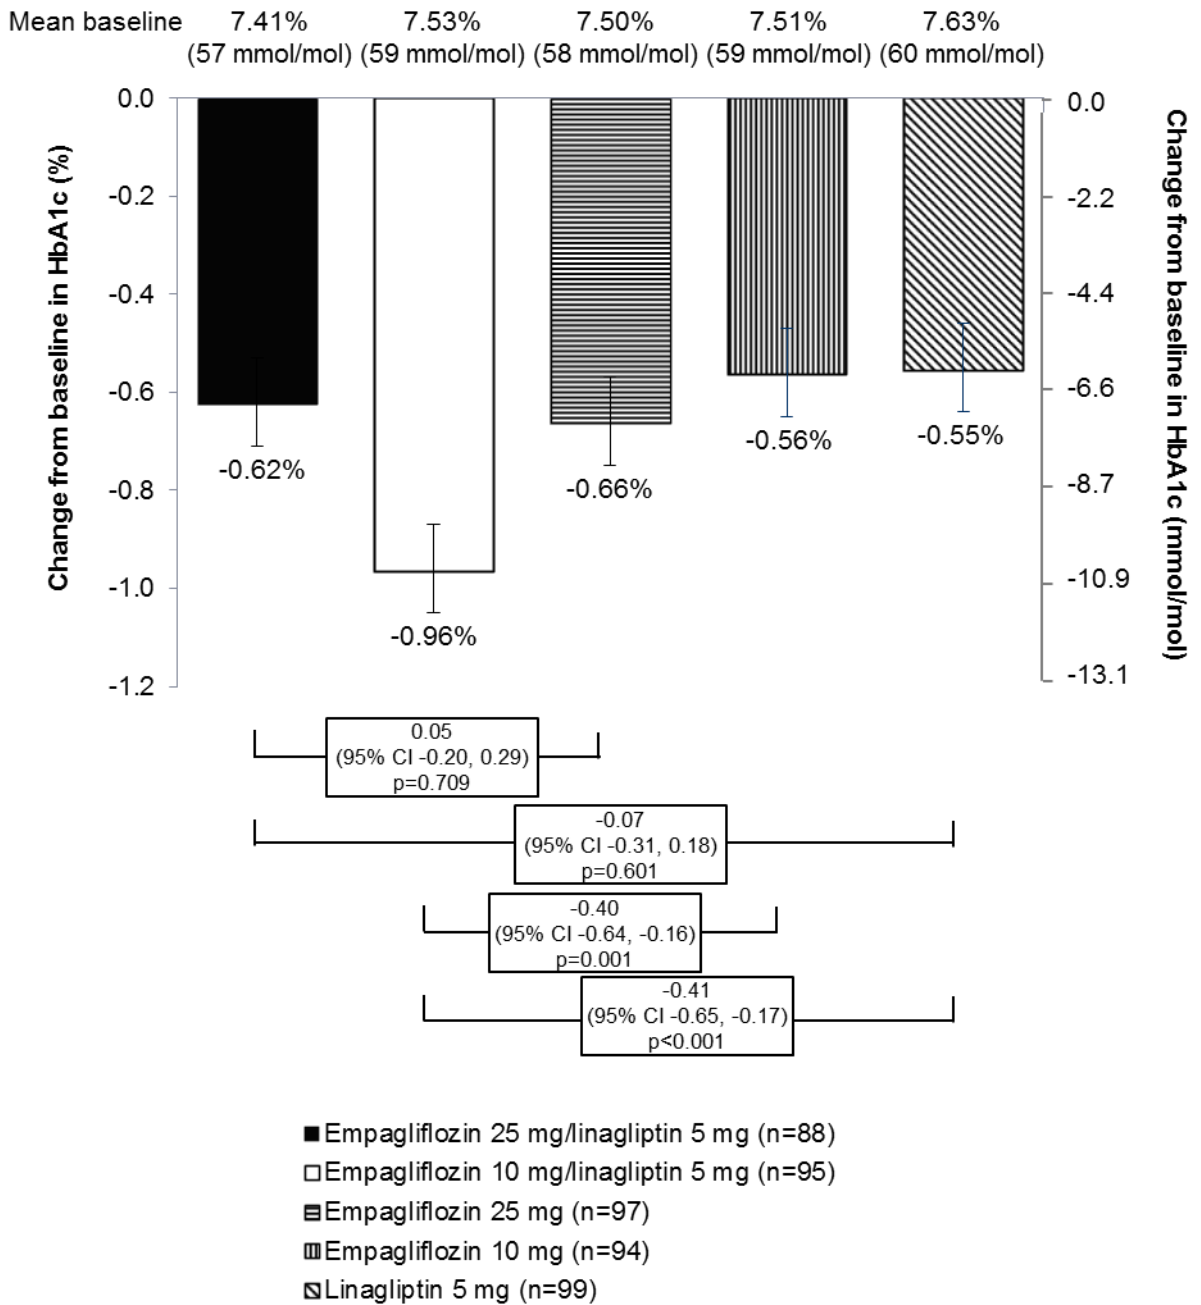



## SUPPLEMENTARY DATA

### List of investigators

**Argentina:** Cesar Javier Zaidman, Pedro Calella, Darío Alejandro Bruera, Georgina Sposetti, Diego Aizenberg. **Australia:** Murray Gerstman, Robert Moses. **Brazil:** Marilia Brito Gomes, Adriana Costa e Forti, Alfredo Halpern, Cristiano Augusto de Freitas Zerbini. **From Bulgaria:** Tsvetalina Tankova, Antoanela Petrova-Gancheva. **Canada:** Naresh Aggarwal, Ian Campbell, Benoit Gervais, Randy Hart, Ben Lasko, Dennis O'Keefe, Calvin Powell, Jean-Pierre Arseneau. **Columbia:** Nicolas Jaramillo, Hernan Yupanqui Lozno, Henry José Garcia Lozada, Jose Luis Accini, Eric Hernandez Triana. **Denmark:** Nils Jakob Knudsen, Steen Bønløkke Pedersen, Hans Henrik Lervang. **Estonia:** Kaja Martsin, Liina Viitas, Hella Vides, Riin Lanno, Tatjana Plavinskaja. **Hungary:** Judit Rapi, Judit Simon, Albert Szocs. **Italy:** Emanuela Orsi, Elena Tortato, Alberto Marangoni, Giuseppe Pugliese. **Lebanon:** Akram Echtay, Atallah Paola, Charles Saab, Marie Helene Ghannage Yared, Khalife Abdul Amir, Elizabeth Shatila. **Malaysia:** Sri Wayu Bt Taher, V. Paranthaman P. Vengasalam. **From Mexico:** Marco A Morales de Teresa, J. Hector Sanchez Mijangos, Jose Gerardo Gonzalez Gonzalez, Beatriz Loreda Coronado, Rafael Vidal Tamayo-Rodríguez. **Peru:** Cesar Manuel Delgado Butron, Angélica María Valdivia Portugal, Lucy Gonzales Bravo, Wilson Gallardo Rojas, Dante Americo Gamarra Gonzalez. **Philippines:** Ernesto Ang, Grace Aquitania, Cecilia Jimeno, Grace Ko De Los Santos, Christy S. Yao, Araceli A. Panelo. **Poland:** Anna Bochenek, Edward Franek, Ewa Krzyzagska. **Romania:** Diana Barbonta, Dana Cosma, Carmen Crisan, Ioana Emilia Ferariu, Lavinia Pop, Gabriela Roman, Magdalena Morosanu, Simona Camelia Tivadar, Cornelia Zetu, Alina Claudia Mot. **Russia:** Mikhail B. Antsiferov, Valeria Esip, Tatiyana Treshkur, Nelly Verbovaya, Natalia Vorokhobina, Tatyana Zykova. **Spain:** Rosa Viñas, Vicente Pereg, Miguel Camafort, Francesc Pont, Luis Comino. **Sweden:** Katarina Berndtsson Blom, Per-Åke Lagerbäck, Hans Larnefeldt. **Taiwan:** Dee Pei, Ju-Ying Jiang, Sheng-Hwu Hsieh, Wayne H-H Sheu, Yun-Shing Peng, Yung-Chuan Lu, Feng-Chieh Yen. **United States of America:** Pat Bass, Oliver Willard, Jeanine Albu, Barbara Biggs, Val Hansen, Whitney Kennedy, Keung Lee, Hipolito Mariano, Mandeep Oberoi, Richard Pish, Sreedhar Samudrala, Samir Arora, Steve Choi, Mahendra Jain, Barry Austin, Bruce Bowling, Robert Eyzaguirre, Randall Fillmore, John Budd III, Richard Hyman, Alejandro Pla, Timothy Smith, James Thrasher, Rachel Kientcha-Tita, Bruce Barker, Charles Crump, Bradford Bergman, Lisa Connery, Angela Porter, Paul Martin, Dale Allison, Robert Hippert, Jung Oh, Donald Sanders, Joanna Van, Jerome Howard, Barry Collins, Cara Dawson, Aziz Laurent, Edgardo Osea, Robert Perry, Jeffrey Sparks, Rita Uzoaga, H. Jackson Downey, Peter Mattar, Elizabeth Bretton, Raymond De La Rosa, Kishor Joshi, Julie Mullen, Andrew Garner, Aresenio Columbie, Gamil Dawood, Purvi Mehra, Diego Torres II, Rennee Dhillon, Tiffany Pluto, Manuel Regalado, Matthew Finneran, Christopher Oldfield, Luis Carlos Quintero, Kent Roberson, Alexander White, Nandini Kohli, Robert Bargar, Michael Chen, Paul Manos, Rica Stamatina, Francisco Badar, Joel Hagedorn, Lawrence Levinson, Richard Dobrusin, Mariananda Kumar, Loknath Shandilya, Kent Hoffman, Hugh Durrence, Richard Janovitz, Daniel Lorber, Michael Dominguez, Andrea Lawless, Gregory Flippo, Garth Denyer, Oscar DeValle, Nidal Morrar, Shahram Jacobs, Ramon Berenguer, David Wyatt, Andrew Lewin, Heidi Kabler, Doug Logan, Giovanni Baula, Paul Emmans, Jerrel Lochner, Eugenio Cersosimo, Lawrence Whitlock, William Boulware, Peter Philander, Kari Uusinarkaus, Vanita Aroda.
